# Supplementary material for: Non-planar geometries of solution processable transparent conducting oxide: from film characterization to architectured electrodes
Source: Royal Society of Chemistry journal article supplement (doi:10.1039/c2ee21296j), 2012-01-01
Supplement: c2ee21296j.pdf [file c2ee21296j.pdf]

## Electronic Supplementary Information (ESI)

# Non-planar geometries of solution processable transparent conducting oxide: From film characterization to architected electrodes

Moe Kevin, Gah Hung Lee and Ghim Wei Ho\*

*Department of Electrical and Computer Engineering,  
National University of Singapore,  
4 Engineering Drive 3, 117576, Singapore.  
E-mail: elehgw@nus.edu.sg*

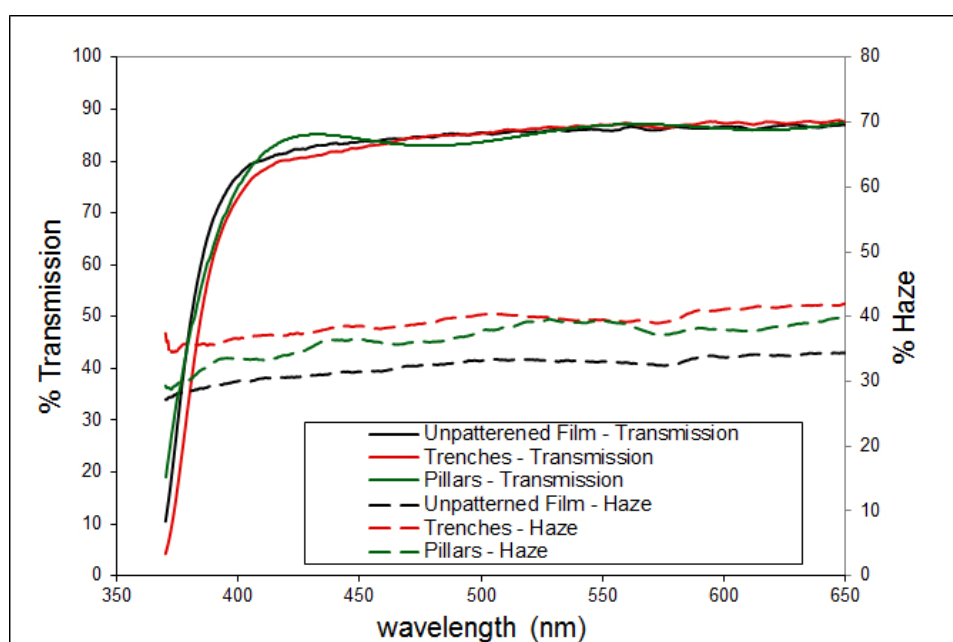

**Fig. S1** Transmission and haze measurements on unpatterned films, trenches and pillars.
